# Supplementary material
Source: PubMed Central journal article supplement (PMC2686654)

Strict consensus tree of four most parsimonious trees produced by ratchet (island hopper) algorithm of NONA 2.0. Only unambiguously optimized characters are shown (black circles are nonhomoplasies and white circles are homoplasies). The numbers at the circles are characters (above) and states (below).

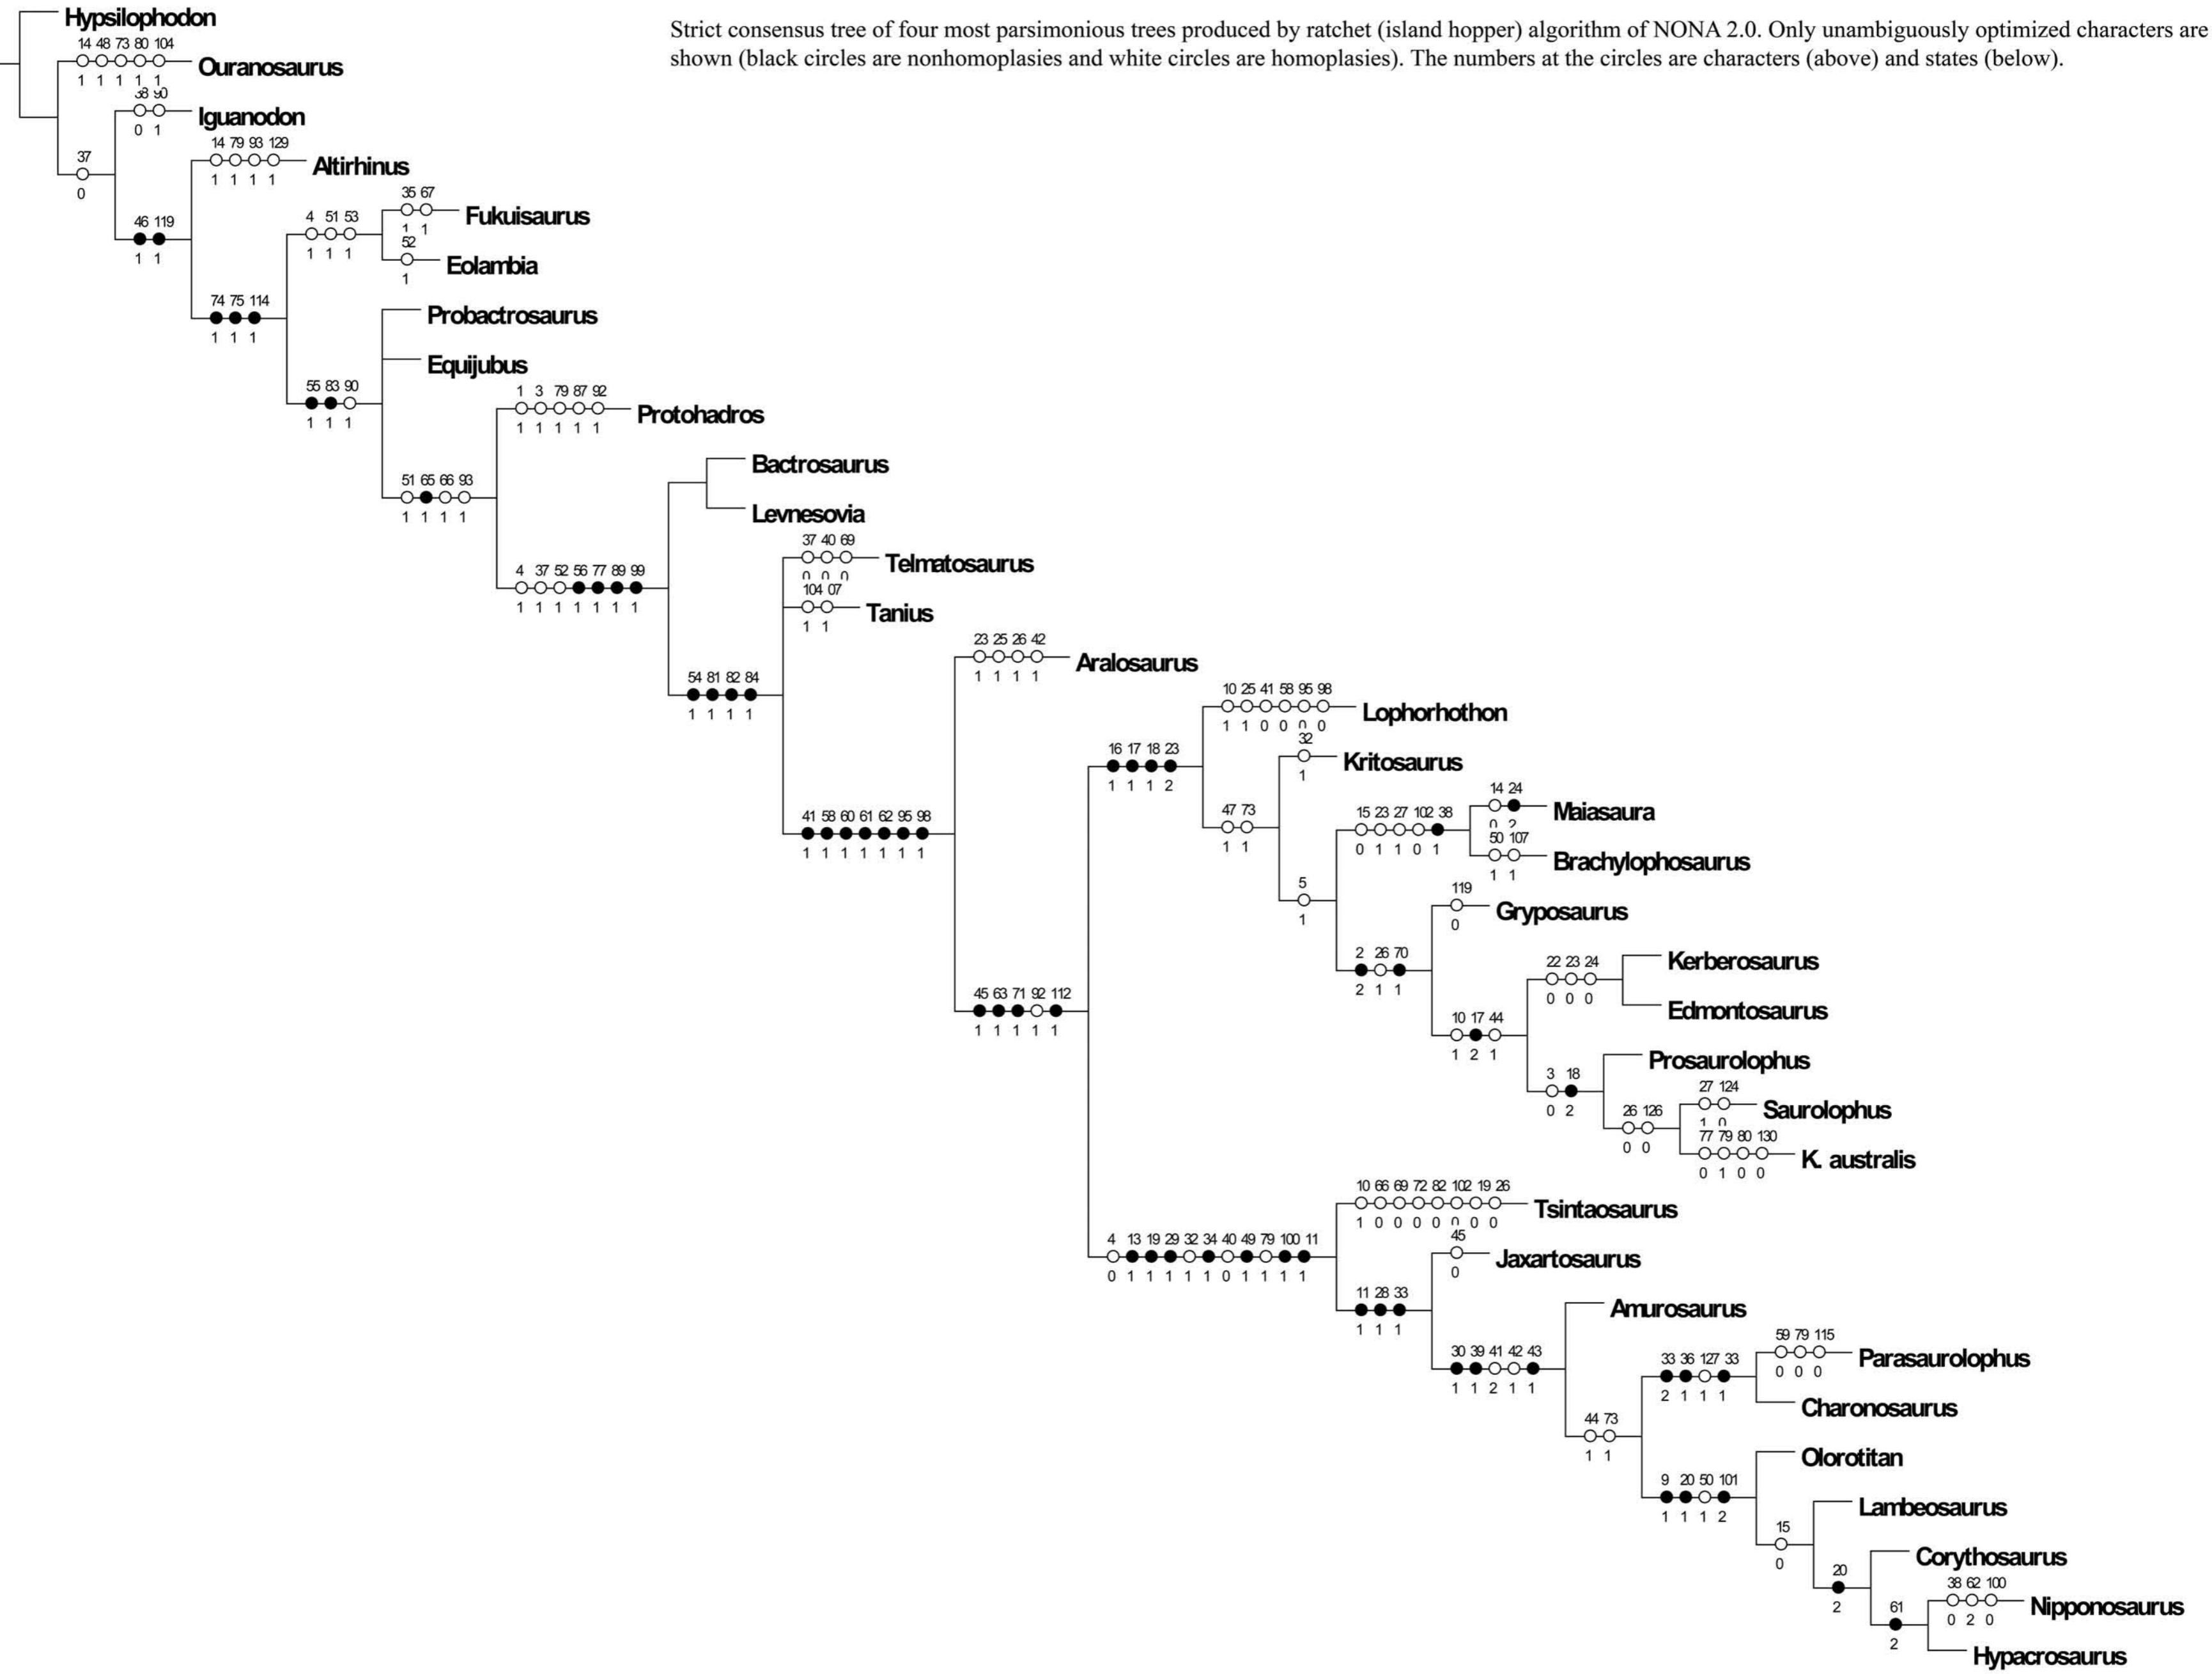

Supplement: rspb20090229s07.pdf [file rspb20090229s07.pdf]
